# Supplementary material for: New Cases and Mutations in SEC23B Gene Causing Congenital Dyserythropoietic Anemia Type II
Source: MDPI journal article supplement (doi:10.3390/ijms24129935), 2023-06-09
Supplement: s1 [file s1]

Supplementary data

# New Cases and Mutations in *SEC23B* Gene Causing Congenital Dyserythropoietic Anemia Type II

Melina Mara Musri <sup>1,†,‡</sup>, Veronica Venturi <sup>2,†</sup>, Xènia Ferrer-Cortès <sup>1,2</sup>,  
Lidia Romero-Cortadellas <sup>2</sup>, Gonzalo Hernández <sup>1,2</sup>, Pilar Leoz <sup>3</sup>, María Pilar Ricard Andrés <sup>4</sup>,  
Marta Morado <sup>5</sup>, María del Carmen Fernández Valle <sup>6</sup>, David Beneitez Pastor <sup>7</sup>,  
Ana Ortuño Cabrero <sup>7</sup>, Maite Moreno Gamiz <sup>8</sup>, Leonor Senent Peris <sup>9</sup>,  
Amanda Isabel Perez-Valencia <sup>10</sup>, Santiago Pérez-Montero <sup>1</sup>, Cristian Tornador <sup>1</sup>  
and Mayka Sánchez <sup>1,2,\*</sup>

Supplementary Figure 1. Validation of patients' mutations by Sanger sequencing.

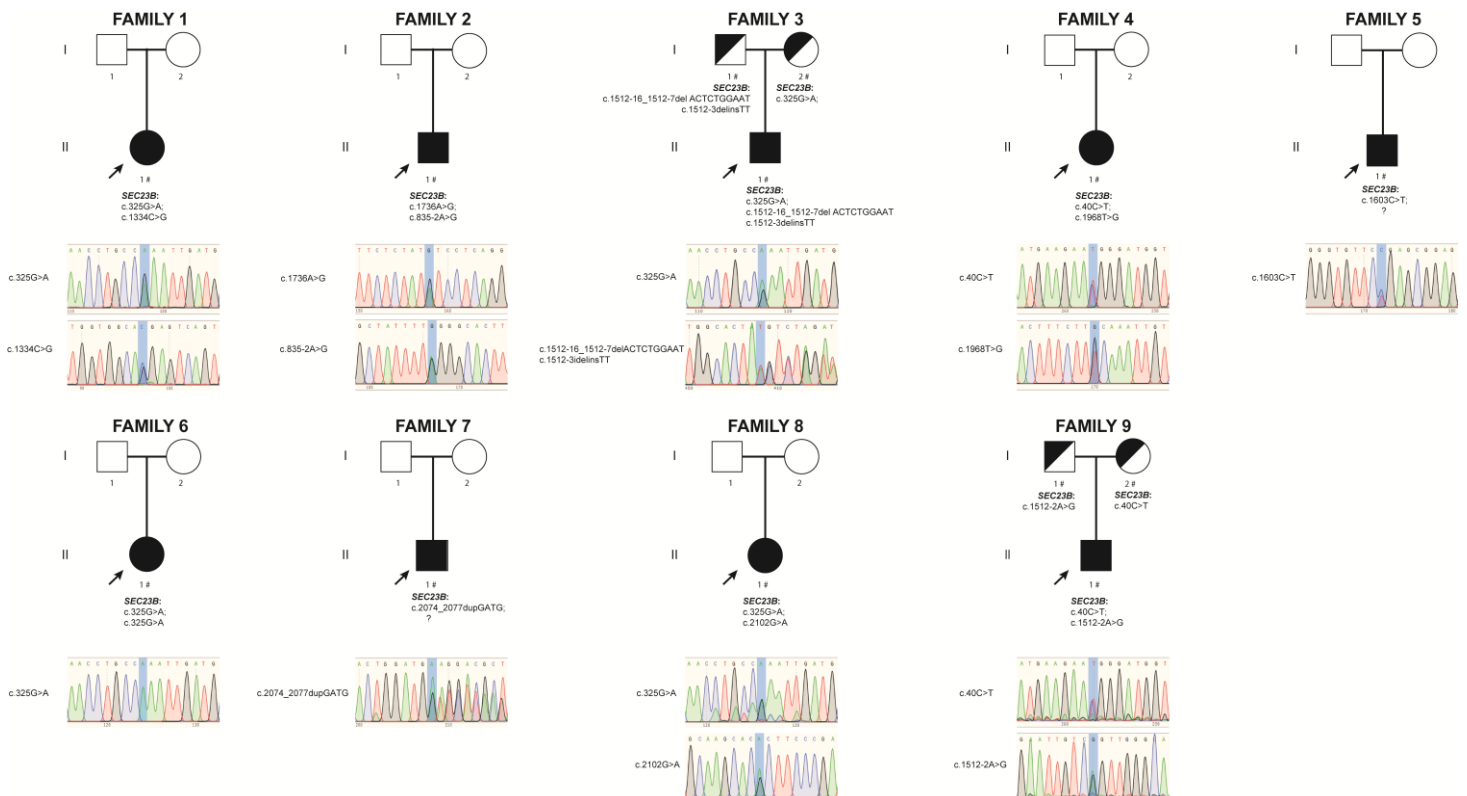

**Supplementary Table 1. Reported mutations in SEC23B.**

| Exon                      | Nucleotide change   | AA change          | Domain            | Reference                   |
|---------------------------|---------------------|--------------------|-------------------|-----------------------------|
| <b>Missense mutations</b> |                     |                    |                   |                             |
| 2                         | c.1A>G              | p.Met1Val          | Segment 1         | Bianchi et al 2016          |
| 2                         | c.40C>T             | p.Arg14Trp         | Segment 1         | Schwarz et al 2009          |
| 2                         | c.52C>T             | p.Arg18His         | Segment 1         | Schwarz et al 2009          |
| 2                         | c.53G>A             | p.Arg18Cys         | Segment 1         | Bianchi et al 2016          |
| 2                         | c.74C>A             | p.Pro25His         | Segment 1         | Liu et al 2012              |
| 2                         | c.122T>C            | p.Leu41Pro         | Segment 1         | Bianchi et al 2016          |
| 2                         | c.197G>A            | p.Cys66Tyr         | Zinc finger       | Fermo et al 2010            |
| 2                         | c.211A>C            | p.Asn71His         | Zinc finger       | Bianchi et al 2016          |
| 3                         | c.221G>A            | p.Cys74Tyr         | Zinc finger       | Russo et al 2013            |
| 3                         | c.247T>G            | p.Trp83Gly         | Zinc finger       | Bianchi et al 2016          |
| 4                         | c.325G>A            | p.Glu109Lys        | Segment 2         | Schwarz et al 2009          |
| 5                         | c.490G>T            | p.Val164Leu        | Trunk             | Moreno Carralero et al 2018 |
| 5                         | c.494G>A            | p.Gly165Asp        | Trunk             | Wang et al 2018             |
| 5                         | c.569G>A            | p.Arg190Gln        | Trunk             | Moreno Carralero et al 2018 |
| 7                         | c.716A>G            | p.Asp239Gly        | Trunk             | Schwarz et al 2009          |
| 8                         | c.887C>T            | p.Pro296Leu        | Trunk             | Bianchi et al 2016          |
| 8                         | c.938G>A            | p.Arg313His        | Trunk             | Schwarz et al 2009          |
| 8                         | c.953T C            | p.Ille318Thr       | Trunk             | Schwarz et al 2009          |
| 9                         | c.1043A>C           | p.Asp348Ala        | Trunk             | Bianchi et al 2009          |
| 9                         | c.1109G>C           | p.Gly370Ala        | Trunk             | Bianchi et al 2016          |
| 10                        | c.1157A>G           | p.Gln386Arg        | Trunk             | Schwarz et al 2009          |
| 10                        | c.1162T>A           | p.Phe388Ile        | Trunk             | Chen et al 2021             |
| 11                        | c.1254T>G           | p.Ille418Met       | Beta sheet        | Russo et al 2010            |
| 11                        | c.1307C>T           | p.Ser436Leu        | Beta sheet        | Russo et al 2010            |
| <b>11</b>                 | <b>c.1334C&gt;G</b> | <b>p.Thr445Arg</b> | <b>Beta sheet</b> | <b>This study</b>           |
| 11                        | c.1352G>T           | p.Cys451Phe        | Beta sheet        | Wang et al 2018             |
| 12                        | c.1385A>G           | p.Tyr462Cys        | Beta sheet        | Schwarz et al 2009          |
| 13                        | c.1415C>T           | p.Pro472Leu        | Beta sheet        | Russo et al 2014            |
| 12                        | c.1445A>G           | p.Gln482Arg        | Beta sheet        | Wang et al 2018             |
| 13                        | c.1453A>G           | p.Thr485Ala        | Beta sheet        | Punzo et al 2011            |
| 13                        | c.1467C>G           | p.His489Gln        | Beta sheet        | Wang et al 2018             |
| 13                        | c.1489C>T           | p.Arg497Cys        | Beta sheet        | Schwarz et al 2009          |
| 13                        | c.1508G>A           | p.Arg503Gln        | Beta sheet        | Iolascon et al 2010         |
| 14                        | c.1571C>T           | p.Ala524Val        | Helical           | Schwarz et al 2009          |
| 14                        | c.1588C>T           | p.Arg530Gln        | Helical           | Iolascon et al 2010         |

|                           |                  |             |             |                             |
|---------------------------|------------------|-------------|-------------|-----------------------------|
| 14                        | c.1589G>A        | p.Arg530Trp | Helical     | Schwarz et al 2009          |
| 14                        | c.1636C>T        | p.Arg546Trp | Helical     | Moreno Carralero et al 2018 |
| 14                        | c.1654C>T        | p.Leu552Phe | Helical     | Russo et al 2010            |
| 15                        | c.1676T>C        | p.Phe559Ser | Helical     | Bianchi et al 2016          |
| 15                        | c.1685A>G        | p.Tyr562Cys | Helical     | Iolascon et al 2010         |
| 15                        | c.1727T>C        | p.Phe576Ser | Helical     | Wang et al 2018             |
| 15                        | c.1733T>C        | p.Leu578Pro | Helical     | Russo et al 2010            |
| 15                        | c.1735T>A        | p.Leu579Asn | Helical     | Russo et al 2010            |
| 15                        | c.1736A>G        | p.Tyr579Cys | Helical     | This study                  |
| 16                        | c.1754A>G        | p.His585Arg | Helical     | Bianchi et al 2016          |
| 16                        | c.1808C>T        | p.Ser603Leu | Helical     | Bianchi et al 2009          |
| 16                        | c.1831C>T        | p.Arg611Trp | Helical     | Li et al 2017               |
| 16                        | c.1832G>C        | p.Arg611Pro | Helical     | Russo et al 2010            |
| 16                        | c.1832G>A        | p.Arg611Gln | Helical     | Moreno Carralero et al 2018 |
| 16                        | c.1858A>G        | p.Met620Val | Helical     | Russo et al 2010            |
| 16                        | c.1859T>C        | p.Met620Thr | Helical     | Zhang et al 2018            |
| 17                        | c.1910T>G        | p.Val637Gly | Gelsolin    | Punzo et al 2011            |
| 17                        | c.1949T>C        | p.Leu650Ser | Gelsolin    | Wang et al 2018             |
| 17                        | c.1964T>C        | p.Phe655Ser | Gelsolin    | Bianchi et al 2016          |
| 17                        | c.1968T>G        | p.Phe656Leu | Gelsolin    | Iolascon et al 2010         |
| 18                        | c.2005 T>C       | p.Trp669Arg | Gelsolin    | Russo et al 2014            |
| 18                        | c.2101C>T        | p.Arg701Cys | Gelsolin    | Bianchi et al 2009          |
| 18                        | c.2102G>A        | p.Arg701His | Gelsolin    | This study                  |
| 17                        | c.2108C>T        | p.Pro703Leu | Gelsolin    | Wang et al 2018             |
| 18                        | c.2129C>T        | p.Thr710Met | Gelsolin    | Amir et al 2011             |
| 19                        | c.2166A>C        | p.Lys723Gln | Segment 6   | Iolascon et al 2010         |
| 19                        | c.2180C>T        | p.Ser727Phe | Segment 6   | Punzo et al 2011            |
| 20                        | c.2270A>C        | p.His757Pro | Segment 6   | Russo et al 2010            |
| <b>Nonsense mutations</b> |                  |             |             |                             |
| 2                         | c.28C>T          | p.Gln10Ter  | Segment 1   | Bianchi et al 2016          |
| 2                         | c.71G>A          | p.Trp24Ter  | Segment 1   | Liu et al 2012              |
| 3                         | c.235C>T         | p.Arg79Ter  | Zinc finger | Schwarz et al 2009          |
| 5                         | c.367C>T         | p.Arg123Ter | Zinc finger | Bianchi et al 2016          |
| 5                         | c.568C>T         | p.Arg190Ter | Trunk       | Bianchi et al 2009          |
| 6                         | c.640C>T         | p.Gln214Ter | Trunk       | Punzo et al 2011            |
| 6                         | c.649C>T         | p.Arg217Ter | Trunk       | Schwarz et al 2009          |
| 7                         | c.790C>T         | p.Arg264Ter | Trunk       | Schwarz et al 2009          |
| 8                         | c.923T>G         | p.Leu308Ter | Trunk       | Bianchi et al 2016          |
| 8                         | c.970C>T         | p.Arg324Ter | Trunk       | Schwarz et al 2009          |
| 9                         | c.1015C>T        | p.Arg339Ter | Trunk       | Russo et al 2010            |
| 10                        | c.1201C>T        | p.Arg401Ter | Segment 3   | Schwarz et al 2009          |
| 13                        | c.1428_1429ins22 | p.Gly477Ter | Beta sheet  | Bianchi et al 2016          |

|                             |                           |                                         |                   |                             |
|-----------------------------|---------------------------|-----------------------------------------|-------------------|-----------------------------|
| 14                          | c.1561C>T                 | p.Gln521Ter                             | Helical           | Moreno Carralero et al 2018 |
| 14                          | c.1603C>T                 | p.Arg535Ter                             | Helical           | Russo et al 2010            |
| 14                          | c.1648C>T                 | p.Arg550Ter                             | Helical           | Iolascon et al 2010         |
| 14                          | c.1660C < T               | p.Arg554Ter                             | Helical           | Bianchi et al 2009          |
| 19                          | c.2152C>T                 | p.Arg718Ter                             | Gelsolin          | Bianchi et al 2009          |
| <b>Frameshift mutations</b> |                           |                                         |                   |                             |
| 3                           | c.222-817_366 + 4242del   | p.Gln75GlufsTer7                        | Zinc finger-Trunk | Schwarz et al 2009          |
| 5                           | c.387delG                 | p.Leu129LeufsTer26                      | Trunk             | Russo et al 2010            |
| 5                           | c.428delAinsCG            | p.Asp143AlafsTer35                      | Trunk             | Bianchi et al 2016          |
| 5                           | c.489delG                 | p.Val164TrpfsTer3                       | Trunk             | Aydin Koker et al 2018      |
| 5                           | c.536_537insTAAG          | p.Cys180LysfsTer3                       | Trunk             | Bianchi et al 2016          |
| 9                           | c.1063delG                | p.Asp355IlefsTer8                       | Trunk             | Schwarz et al 2009          |
| 10                          | c.1129_1130del GA         | p.Asp377PhefsTer17                      | Trunk             | Bianchi et al 2016          |
| 13                          | c.1419_1423insC           | p.Ile473IlefsTer47                      | Beta sheet        | Russo et al 2013            |
| 16                          | c.1821delT                | p.His608IlefsTer7                       | Segment 5         | Bianchi et al 2009          |
| 17                          | c.1962-64delT             | p.Thr654ThrfsTer13                      | Gelsolin          | Iolascon et al 2010         |
| 17                          | c.1989_1990insT           | p.Glu664Ter                             | Gelsolin          | Bianchi et al 2016          |
| <b>18</b>                   | <b>c.2074_2077dupGATG</b> | <b>p.Asp693GlyfsTer2</b>                | <b>Gelsolin</b>   | <b>This study</b>           |
| 19                          | c.2150delC                | p.Ala717ValfsTer7                       | Gelsolin          | Russo et al 2010            |
| 20                          | c.2262delC                | p.Phe754LeufsTer5                       | Segment 6         | Bianchi et al 2016          |
| 20                          | c.2254_2255insA           | p.Val753GlifsTer17                      | Segment 6         | Wang et al 2018             |
| <b>Indels</b>               |                           |                                         |                   |                             |
| 7                           | c.733_735del CTT          | p.Leu245del                             | Trunk             | Bianchi et al 2016          |
| 14                          | c.1603delC                | p.Arg535del                             | Helical           | Chen et al 2021             |
| 16                          | c.1857_1859delCAT         | p.Ile619del                             | Segment 4         | Russo et al 2010            |
| 20                          | c.2243_2245delATG         | p.Asp748ValVal749del                    | Segment 6         | Bianchi et al 2016          |
| <b>Splicing mutations</b>   |                           |                                         |                   |                             |
| Intron 2                    | c.221 + 31A>G             | New donor site creation (->0.99)*       |                   | Russo et al 2010            |
| Intron 2                    | c.221+163A>G              | Cryptic donor site (1.79>8.95) Δ +400 # |                   | Russo et al 2013            |
| Intron 2                    | c.222-78C>T               | RNA Decay*                              |                   | Russo et al 2014            |
| Intron 3                    | c.279 + 3A>G              | Donor site alteration (1.00>0.95)e      |                   | Russo et al 2010            |
| Intron 3                    | c.279+5 G>A               | aberrant splicing                       |                   | Bianchi et al 2016          |
| Intron 4                    | c.367-1G>A                | aberrant splicing                       |                   | Bianchi et al 2016          |
| Intron 6                    | c.689 + 1G>A              |                                         |                   | Schwarz et al 2009          |
| Intron 6                    | c.689 + 1G>C              | disease causing                         |                   | Yehia et al 2015            |
| Intron 7                    | c.834+3A>C                | Donor splice site (8.88>3.31) – Δ 62.7# |                   | Russo et al 2013            |

|                   |                         |                                |                    |
|-------------------|-------------------------|--------------------------------|--------------------|
| Intron 7          | c.835-2A>G              | Aberrant splicing              | Bianchi et al 2016 |
| Intron 9          | c.1109+1G>A             | Donor site abolition (0.93>-)e | Russo et al 2010   |
| Intron 9          | c.1109+5G>A             | Donor site abolition (0.93>-)e | Russo et al 2010   |
| Intron 13         | <b>c.1512-2A&gt;G</b>   |                                | <b>This study</b>  |
| Intron 13         | <b>c.1512-3delinsTT</b> |                                | <b>This study</b>  |
| Intron 18         | c.2149-2A>G             |                                | Zhang et al 2018   |
| <b>Regulatory</b> |                         |                                |                    |
| 5'UTR             | c.-589A>G               |                                | Russo et al 2014   |
| 5'UTR             | c.-34G>A                |                                | Russo et al 2014   |

\* Splice Site Prediction by Neural Network (WT sequence score > mutated sequence score).

#HSF, Human Splicing Finder (<http://www.umd.be/HSF/>).
